# Supplementary material for: Regulatory Impact Assessment of the High Salt Menu Labeling and Physical Activity Calorie Labeling Regulations in Saudi Arabia
Source: Research Square preprint supplement (doi:10.21203/rs.3.rs-7500458/v1), 2025-09-03
Supplement: Supplementary file 1 [file 2e8523b431b38d0d7275cf6a.docx]

| Appendix 1. Saudi Arabia life Table 2019 | | | | | | | |
| --- | --- | --- | --- | --- | --- | --- | --- |
| **year** | **I(X)** | **D(x)** | **Q(X)** | **S(X)** | **L(X)** | **T(X)** | **e(X)** |
| **number life** | **number death** | **death probability** | **life probability** | **person-years** | **total person-years by C** | **life expectancy** |
| <1 | 100000 | 583 | 0.0058257430 | 0.994 | 99417 | 7459658 | 74.60 |
| 1-4 | 99417 | 97 | 0.0009767850 | 0.999 | 397670 | 7360241 | 74.03 |
| 5-9 | 99320 | 83 | 0.0008337330 | 0.999 | 496602 | 6962571 | 70.10 |
| 10-14 | 99238 | 90 | 0.0009050480 | 0.999 | 496188 | 6465970 | 65.16 |
| 15-19 | 99148 | 270 | 0.0027279560 | 0.997 | 495738 | 5969782 | 60.21 |
| 20-24 | 98877 | 506 | 0.0051163120 | 0.995 | 494386 | 5474044 | 55.36 |
| 25-29 | 98371 | 640 | 0.0065089010 | 0.993 | 491857 | 4979657 | 50.62 |
| 30-34 | 97731 | 822 | 0.0084123670 | 0.992 | 488655 | 4487801 | 45.92 |
| 35-39 | 96909 | 1090 | 0.0112462590 | 0.989 | 484544 | 3999145 | 41.27 |
| 40-44 | 95819 | 1559 | 0.0162686490 | 0.984 | 479095 | 3514601 | 36.68 |
| 45-49 | 94260 | 2269 | 0.0240717010 | 0.976 | 471301 | 3035506 | 32.20 |
| 50-54 | 91991 | 3326 | 0.0361522060 | 0.964 | 459956 | 2564205 | 27.87 |
| 55-59 | 88666 | 4701 | 0.0530173760 | 0.947 | 443328 | 2104249 | 23.73 |
| 60-64 | 83965 | 6493 | 0.0773270040 | 0.923 | 419823 | 1660921 | 19.78 |
| 65-69 | 77472 | 8494 | 0.1096454590 | 0.890 | 387360 | 1241098 | 16.02 |
| 70-74 | 68978 | 11129 | 0.1613371370 | 0.839 | 344888 | 853738 | 12.38 |
| 75-79 | 57849 | 13928 | 0.2407585690 | 0.759 | 289244 | 508851 | 8.80 |
| 80-84 | 43921 | 15686 | 0.3571387060 | 0.643 | 219606 | 219606 | 5.00 |
